# Supplementary material for: Association of School Instructional Mode with Community COVID-19 Incidence during August–December 2020 in Cuyahoga County, Ohio
Source: MDPI journal article supplement (doi:10.3390/ijerph21050569), 2024-04-29
Supplement: s1 [file s1]

## **Supplement—Terebuh et al**

### **Supplementary Materials and Methods**

#### **Table S1**

#### **References**

### **Supplementary Materials and Methods**

The Social Vulnerability Index (SVI) has been developed as a public health planning and preparedness tool for the distribution of resources. “Social vulnerability refers to the potential negative effects on communities caused by external stresses on human health.” Disease outbreaks were one of the scenarios for which the SVI was created. The composite SVI reflects a census tract’s percentile rank ranging from 0 to 1, with a higher value corresponding to greater vulnerability. The composite SVI is constructed by combining the rankings of the 15 individual U.S. census variables listed below.

- Socioeconomic Status
  - Below Poverty
  - Unemployed
  - Income
  - No High School Diploma
- Household Characteristics
  - Aged 65 & Older
  - Aged 17 & Younger
  - Civilian with a Disability
  - Single-Parent Households
  - English Language Proficiency
- Racial & Ethnic Minority Status
  - Hispanic or Latino (of any race); Black and African American, Not Hispanic or Latino; American Indian and Alaska Native, Not Hispanic or Latino; Asian, Not Hispanic or Latino; Native Hawaiian and Other Pacific Islander, Not Hispanic or Latino; Two or More Races, Not Hispanic or Latino; Other Races, Not Hispanic or Latino
- Housing Type & Transportation
  - Multi-Unit Structures
  - Mobile Homes
  - Crowding
  - No Vehicle
  - Group Quarters

**Table S1.** Zip code total population and social vulnerability index.

| Zip Code <sup>1</sup> | Total Population | Social Vulnerability Index <sup>2</sup> | Instructional Mode <sup>3</sup>        |
|-----------------------|------------------|-----------------------------------------|----------------------------------------|
| 44017                 | 18903            | 0.39                                    | NRI                                    |
| 44040                 | 2903             | 0.01                                    | NRI                                    |
| 44070                 | 31847            | 0.33                                    | NRI                                    |
| 44102                 | 45514            | 0.85                                    | RI                                     |
| 44103                 | 16519            | 0.90                                    | RI                                     |
| 44104                 | 19640            | 0.94                                    | RI                                     |
| 44105                 | 37211            | 0.80                                    | RI                                     |
| 44107                 | 50666            | 0.34                                    | RI                                     |
| 44108                 | 21939            | 0.82                                    | RI                                     |
| 44109                 | 40246            | 0.95                                    | RI                                     |
| 44110                 | 19116            | 0.87                                    | RI                                     |
| 44111                 | 42821            | 0.71                                    | RI                                     |
| 44112                 | 21909            | 0.85                                    | RI                                     |
| 44113                 | 20358            | 0.61                                    | RI                                     |
| 44114                 | 6567             | 0.87                                    | RI                                     |
| 44115                 | 8284             | 0.76                                    | RI                                     |
| 44116                 | 20338            | 0.24                                    | NRI                                    |
| 44117                 | 9611             | 0.67                                    | NRI                                    |
| 44118                 | 38833            | 0.41                                    | RI                                     |
| 44123                 | 16515            | 0.56                                    | NRI                                    |
| 44126                 | 16372            | 0.22                                    | NRI                                    |
| 44127                 | 4375             | 0.91                                    | RI                                     |
| 44129                 | 28276            | 0.36                                    | NRI                                    |
| 44132                 | 14805            | 0.69                                    | NRI                                    |
| 44133                 | 30225            | 0.27                                    | RI                                     |
| 44134                 | 37533            | 0.42                                    | NRI                                    |
| 44135                 | 27640            | 0.71                                    | RI                                     |
| 44136                 | 25776            | 0.28                                    | NRI                                    |
| 44137                 | 22657            | 0.64                                    | RI                                     |
| 44138                 | 22378            | 0.19                                    | NRI                                    |
| 44139                 | 24212            | 0.34                                    | NRI                                    |
| 44140                 | 15391            | 0.06                                    | NRI                                    |
| 44141                 | 13830            | 0.13                                    | NRI                                    |
| 44142                 | 18674            | 0.55                                    | NRI                                    |
| 44145                 | 32378            | 0.31                                    | NRI                                    |
| 44146                 | 29223            | 0.55                                    | RI                                     |
| 44149                 | 18976            | 0.10                                    | NRI                                    |
|                       |                  |                                         | RI mean = 0.7294<br>(0.2726 – 0.9523)  |
|                       |                  |                                         | NRI mean = 0.3304<br>(0.0177 – 0.6969) |
| Range                 | (2903 – 45514)   | (0.0177 – 0.9523)                       |                                        |

<sup>1</sup>Zip codes straddling more than one school district (>10%) were excluded from the analysis.

<sup>2</sup>Social Vulnerability Index estimate was population weighted by U.S. Census Tract within each zip code. U.S. Census Tract populations that straddled zip codes were assigned to the majority zip code unless the population majority was evenly divided (within 60:40). Those census populations were split between the two zip codes.

<sup>3</sup>Zip codes in school districts that remained in remote mode (RI) during the entire study period; non-remote instructional mode (NR) included in this category if they employed any non-remote schooling during the study period. RI = remote instruction; NRI = non-remote instruction

## Supplementary References

1. CDC/ATSDR Social Vulnerability Index. <https://www.atsdr.cdc.gov/placeandhealth/svi/index.html>
2. CDC/ATSDR SVI Data and Documentation Download.  
[https://www.atsdr.cdc.gov/placeandhealth/svi/data\\_documentation\\_download.html](https://www.atsdr.cdc.gov/placeandhealth/svi/data_documentation_download.html)
3. Flanagan B, Gregory E, Hallisey E, et al. A social vulnerability index for disaster management. *Journal of Homeland Security and Emergency Management*. 2011;8(1).  
[https://www.atsdr.cdc.gov/placeandhealth/svi/img/pdf/Flanagan\\_2011\\_SVIforDisasterManagement-508.pdf](https://www.atsdr.cdc.gov/placeandhealth/svi/img/pdf/Flanagan_2011_SVIforDisasterManagement-508.pdf)
